# Supplementary material for: Efficacy of Hair Total Mercury Content as a Biomarker of Methylmercury Exposure to Communities in the Area of Artisanal and Small-Scale Gold Mining in Madre de Dios, Peru
Source: MDPI journal article supplement (doi:10.3390/ijerph182413350), 2021-12-18
Supplement: s1 [file s1]

**Supplementary Information for:**

**Efficacy of hair total mercury content as a biomarker of methylmercury exposure to communities in the area of artisanal and small-scale gold mining in Madre de Dios, Peru**

Faye Koenigsmark<sup>1</sup>, Caren Weinhouse<sup>2</sup>, Axel J. Berky<sup>3</sup>, Ana Maria Morales<sup>4</sup>, Ernesto Ortiz<sup>5</sup>, Eric M. Pierce<sup>6</sup>, William K. Pan<sup>3,7\*</sup>, Heileen Hsu-Kim<sup>1\*</sup>

<sup>1</sup>Civil and Environmental Engineering, Box 90287, Duke University, Durham, North Carolina 27708, USA

<sup>2</sup>Oregon Health and Science University, 3181 SW Sam Jackson Park Road, Portland, Oregon, 97239, USA

<sup>3</sup>Nicholas School of the Environment, Duke University, 9 Circuit Drive, Durham, North Carolina, 27710, USA

<sup>4</sup>Centro Nacional de Salud Intercultural, Instituto Nacional de Salud, Ministerio de Salud, Cápac Yupanqui 1400 - Jesus María, Lima 11, Peru

<sup>5</sup>Duke Global Health Innovation Center, Duke University, 310 Blackwell Street, Durham, NC, 27701, USA

<sup>6</sup>Environmental Sciences Division, Oak Ridge National Laboratory, Oak Ridge, TN 37831, USA

<sup>7</sup>Duke Global Health Institute, Duke University, 310 Trent Drive, Durham, North Carolina 27710, USA

\*Co-Corresponding authors:

William K. Pan: +1-919-684-4108, [william.pan@duke.edu](mailto:william.pan@duke.edu)

Heileen Hsu-Kim: +1-919-660-5109, [hsukim@duke.edu](mailto:hsukim@duke.edu)

## Table of Contents

### Section S1. Summary of Previously Published Data

**Table S1.** Summary of previous studies measuring total mercury (THg) and methylmercury (MeHg) in hair samples from individuals near/within ASGM activity .....S3

**Table S2.** Summary of studies reporting average (avg.) and standard deviation (s.d.) of %MeHg in hair for individuals from fish-consuming populations .....S4

### Section S2: Reference Material and Internal Standard Recoveries for THg and MeHg Analyses

**Figure S1.** Histogram of recoveries of the THg Certified Reference Material (CRM) .....S5

**MeHg Analysis Method for Hair Samples and Internal Standard Recoveries** .....S5

**Figure S2.** Histograms of  $\text{CH}_3^{201}\text{HgCl}$  internal standard recovery in MeHg Hair Reference Material (RM) and the resulting MeHg RM recovery.....S6

**Figure S3.** Relationship between recovery of  $\text{CH}_3^{201}\text{HgCl}$  internal standard in MeHg RMs and the resulting recovery of the RM itself .....S6

**Figure S4.** Histogram of  $\text{CH}_3^{201}\text{HgCl}$  internal standard recoveries in proximal and temporal hair samples and the relationship with MeHg and %MeHg measurements .....S7

**Figure S5.** Comparison of hair MeHg divided by THg contents (expressed as a percentage) for study cohort when the  $\text{CH}_3^{201}\text{HgCl}$  internal standard recovery cutoff is 40% and 70% .....S8

### Section S3: Measurement Uncertainty Analysis for Hair THg and MeHg

**Hair Total Mercury Uncertainty** .....S9

**Table S3.** Determination of biological variability of THg via triplicate measurement of hair total mercury .....S10

**Table S4.** Summary of relative standard uncertainty for each component of the hair THg measurements.....S11

**Hair Total Methylmercury Uncertainty** .....S11

**Table S5.** Summary of relative standard uncertainty for each component of the hair MeHg measurements. ....S12

### Section S4. Hair Segment Analysis

**Figure S6.** %MeHg results for 2-cm hair segments of individuals in Diamante and Huepetuhe.....S14

**Figure S7.** Total mercury and methylmercury results for 2-cm hair segments of individuals in Diamante and Huepetuhe.....S15

### Section S5. Statistical Analyses: Predictors of Hair THg and MeHg content

**Table S6.** Description of predictor variables used in mixed effect models .....S16

**Table S7.** Mixed effects models showing determinants of hair THg levels .....S17

**Figure S8.** Forest plots of determinants of hair THg levels .....S17

**Table S8.** Mixed effects models showing determinants of hair MeHg levels .....S18

**Figure S9.** Forest plots of determinants of hair methylmercury levels .....S18

**Table S9.** Mixed effects models showing determinants of hair %MeHg level.....S19

**Figure S10.** Forest plots of determinants of hair %MeHg levels .....S19

**Table S10.** Odds ratios of individuals within mining having %MeHg < 66%.....S20

**Figure S11.** Forest plots of determinants of hair %MeHg < or ≥ 66%.....S20

**Figure S12.** Predicted probabilities of hair %MeHg <66% by job and sex.....S21

**Table S11.** Pearson correlations between natural log (ln) transformed hair THg and MeHg contents by community groupings .....S22

### Section S6: SI References.....S23

## Section S1. Summary of Previously Published Data

**Table S1.** Summary of previous studies measuring total mercury (THg) and methylmercury (MeHg) in hair samples from individuals near/within ASGM activity.

| Authors          | Study Region                      | Sample Size | THg Range (µg/g)      | MeHg Range (µg/g)     | %MeHg Range                           | Cohort Description                |
|------------------|-----------------------------------|-------------|-----------------------|-----------------------|---------------------------------------|-----------------------------------|
| Sherman 2015[1]  | Kegitia, Ghana                    | 7           | 0.61-1.71             | 0.06-0.20             | 8-29                                  | Gold miners                       |
|                  | Sekotong, Indonesia               | 4           | 2.75-5.49             | 1.52-2.15             | 32-55, 72                             | 3 gold miners, 1 farmer           |
| Laffont 2011[2]  | Bolivia                           | 5           | 0.17-2.35             | 0.12-0.46             | 9-40                                  | Native gold miners                |
|                  |                                   | 17          | 0.23-2.25             | 0.073-0.99            | 4-86                                  | Alluvial gold miners              |
| Harada 1999[3]   | Simbasirori, Tanzania             | 3           | 5.95-94.3             | 0.30-1.22             | 1.0-20.5                              | Gold miners                       |
|                  | Seweya, Tanzania                  | 3           | 48.2-416              | 0.62-1.52             | 0.2-1.7                               | Fishing village near ASGM         |
|                  | Mwanza, Tanzania                  | 3           | 80.2-474              | 3.42-5.3              | 1.1-4.7                               | City dwellers near ASGM           |
| Akagi 1995[4]    | Itaituba, Brazil                  | 7           | 0.5-110 <sup>a</sup>  | 0.3-3.0 <sup>a</sup>  | 1.5-50 <sup>b</sup>                   | Gold miners                       |
|                  |                                   | 4           | 7.5-32.3 <sup>a</sup> | 0.95-3.9 <sup>a</sup> | 6.7-53 <sup>b</sup>                   | Gold shop workers                 |
|                  | Rainha, Brazil                    | 11          | 2.4-21.4              | 1.9-29.4              |                                       |                                   |
|                  | Brasilia Legal, Brazil            | 37          | 3.5-46.9              | 0.9-42.6              |                                       |                                   |
|                  | Ponta de Pedras, Brazil           | 10          | 6.2-12.6              | 4.7-12.0              | 90 <sup>c</sup>                       | Fishing village near ASGM         |
|                  | Jacareacanga, Brazil              | 48          | 1.5-46.1              | 1.1-49.9              |                                       |                                   |
|                  | Tres Bocas, Brazil                | 11          | 8.4-53.8              | 6.1-50.3              |                                       |                                   |
| Ikingura 1996[5] | Mugusu, Tanzania                  | 13          | 0.505-214             | 0.128-0.380           | 0.1-69.1                              | Inhabitants mining village        |
|                  | Nungwe Bay, Tanzania              | 9           | 0.156-0.442           | 0.085-0.308           | 20.5-82.1                             | Fishing village downstream ASGM   |
| Malm 1995[6]     | Brasilia Legal, Brazil March 1992 | 28          | 2-46 <sup>a</sup>     | 1-42 <sup>a</sup>     | 4-110 <sup>b</sup> (89 <sup>c</sup> ) | Fish consuming, downstream mining |
|                  | August 1992                       | 25          | 7-151                 | 5-132                 | 71-100 (85 <sup>c</sup> )             |                                   |

<sup>a</sup>Estimated visually from reported figures; <sup>b</sup>calculated from estimated MeHg and THg values; <sup>c</sup>reported average

**Table S2.** Summary of studies reporting average (avg.) and standard deviation (s.d.) of %MeHg in hair for individuals from fish-consuming populations.

| Reference                        | Country            | N   | % MeHg<br>avg. $\pm$ s.d. |
|----------------------------------|--------------------|-----|---------------------------|
| Gao <i>et al.</i> (2010)[7]      | Belgium            | 10  | 71.2 $\pm$ 19.2           |
| Kehrig <i>et al.</i> (1998) [8]  | Brazil             | 20  | 95.0 $\pm$ 7.0            |
| Dermelj <i>et al.</i> (1983)[9]  | Greece, Yugoslavia | 22  | 76.5 $\pm$ 29.0           |
| Laffont <i>et al.</i> (2011)[10] | France             | 3   | 79.8 $\pm$ 17.6           |
| Majed <i>et al.</i> (1999)[11]   | Kuwait             | 100 | 95.6 $\pm$ 3.9            |
| Majed <i>et al.</i> (1999)[11]   | Kuwait             | 35  | 97.1 $\pm$ 2.5            |
| Diez <i>et al.</i> (2009)[12]    | Spain              | 65  | 75.0 $\pm$ 15.0           |
| Diez <i>et al.</i> (2009)[12]    | Spain              | 71  | 76.0 $\pm$ 17.0           |
| Lebel <i>et al.</i> (1998)[13]   | Brazil             | 91  | 89.6 $\pm$ 3.0            |
| Soria <i>et al.</i> (1992)[14]   | Spain              | 50  | 58.0 $\pm$ 26.0           |
| Soria <i>et al.</i> (1992)[14]   | Spain              | 17  | 90.0 $\pm$ 6.0            |
| Akagi <i>et al.</i> (1995)[15]   | Brazil             | 18  | 87.0 $\pm$ 5.0            |

## Section S2: Reference Material and Internal Standard Recoveries for THg and MeHg Analyses

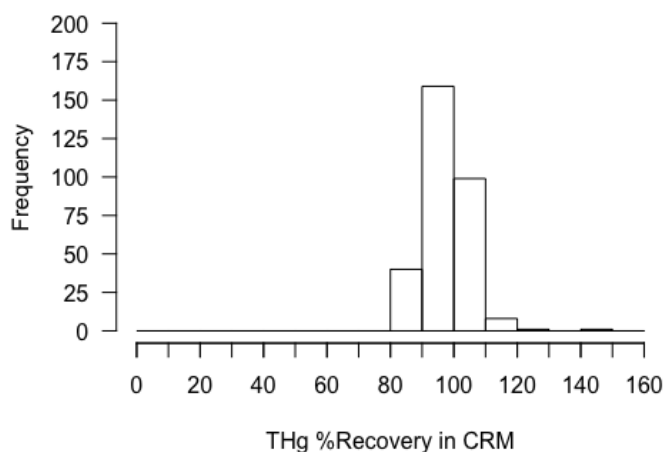

**Figure S1.** Histogram of the recoveries of the THg reference value for hair CRM (ERM-DB001) following analysis via thermal decomposition, amalgamation, and atomic absorption detection (Milestone DMA-80). The average recovery  $\pm$  standard deviation was  $98\% \pm 6.9\%$  ( $n=308$ ).

### MeHg Analysis Method for Hair Samples and Internal Standard Recoveries

MeHg content was determined by extraction with tetramethylammonium hydroxide [16], followed by analysis of extracts by aqueous phase ethylation, purge-trap on Tenax resin and gas chromatographic separation (BrooksRand MerxM), and inductively coupled plasma mass spectrometry (Agilent 7700). Instruments were calibrated using dilutions of a Brooks Applied Labs certified 1 mg/L Methylmercury Standard. In order for the calibration curve to be used, each point on the curve had to be within 10% of the expected value. Additionally, calibration checks were performed every 15 to 20 samples during the batch run and also had to be within 10% of their expected value in order for subsequent measurements to be accepted.

With each batch of hair samples (approx. 20-30 samples), two samples of a hair reference material (RM) with a reference value of 0.258  $\mu\text{g/g}$  (95% confidence interval 0.236 – 0.279  $\mu\text{g/g}$ ) (International Atomic Energy Agency 086) were processed in parallel for extraction and analysis. For all hair analyses, an aliquot of a stable MeHg isotope standard ( $\text{CH}_3^{201}\text{HgCl}$ ) was added to each sample (RMs and hair samples) prior to the extraction step, and this MeHg spike was used as an internal standard (IS) to account for variable recoveries during the sample processing and analysis.

When accounting for IS recovery (shown in Figure S2A), the MeHg measurements of the RM averaged to  $99\% \pm 8.4\%$  ( $n=50$ ) of the reference value (Figure S2B). The recovery of the  $\text{CH}_3^{201}\text{HgCl}$  IS was not correlated with recovery of the reference MeHg value (Figure S3). As such, we established IS recovery of  $>40\%$  as the threshold for inclusion of sample analyses in the reported results. For samples that met this threshold, the average IS recovery for proximal hair measurements (i.e., the data shown in Figure 2A) was  $82\% \pm 14\%$  (Figure S4A). The average IS recovery for analysis of distal hair segments (i.e., the data shown in Figures S11 and S12) was  $93\% \pm 18\%$  (Figure S4D). For both proximal and distal hair segments, MeHg content and %MeHg were not correlated with IS recovery (Figures S4B,C and S4E,F, respectively), indicating that variation in IS recovery was not greatly influencing MeHg results.

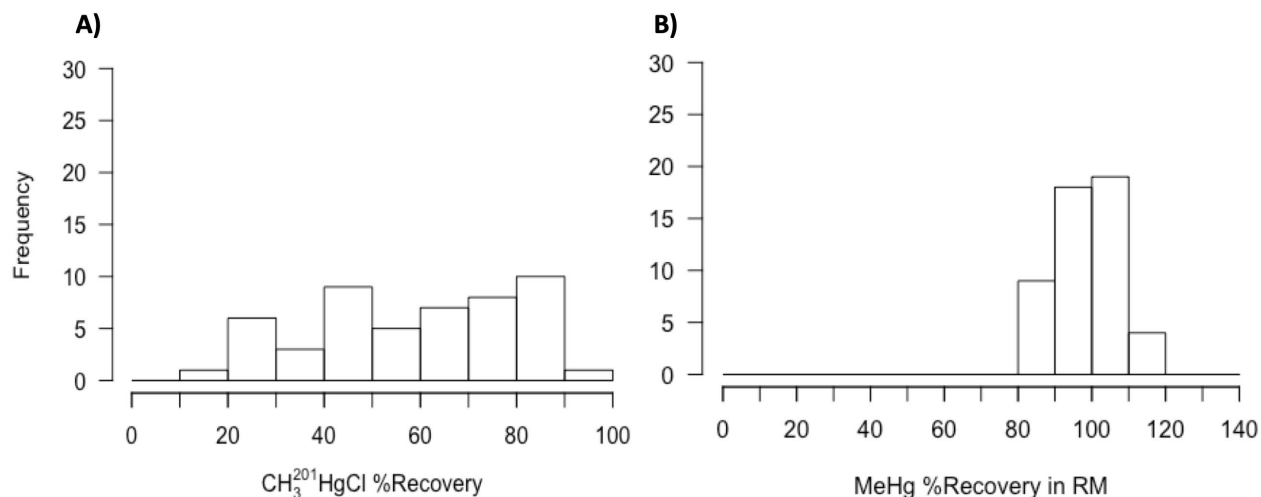

**Figure S2.** Histograms of (A) Recovery of the  $\text{CH}_3^{201}\text{HgCl}$  internal standard spiked into the reference material (IAEA-086) for MeHg analysis; and (B) The measured recoveries of the published MeHg reference value for the reference material. The IAEA-086 RM was extracted and analyzed in duplicate with each batch of study samples, for a total of  $n=50$  measurements of the reference material.

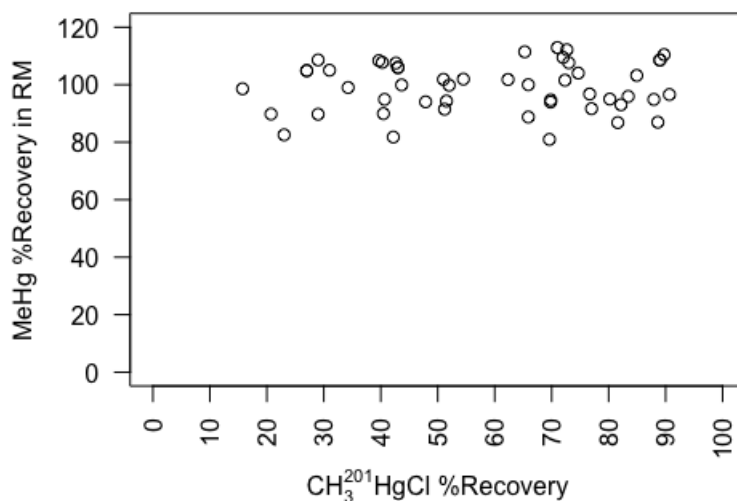

**Figure S3.** Relationship between recovery of the  $\text{CH}_3^{201}\text{HgCl}$  internal standard and the % recovery of reference value for the RM. Despite internal standard recovery for the RM ranging from 10% to 100%, the measured MeHg in the RM was at least 80% of the reference value.

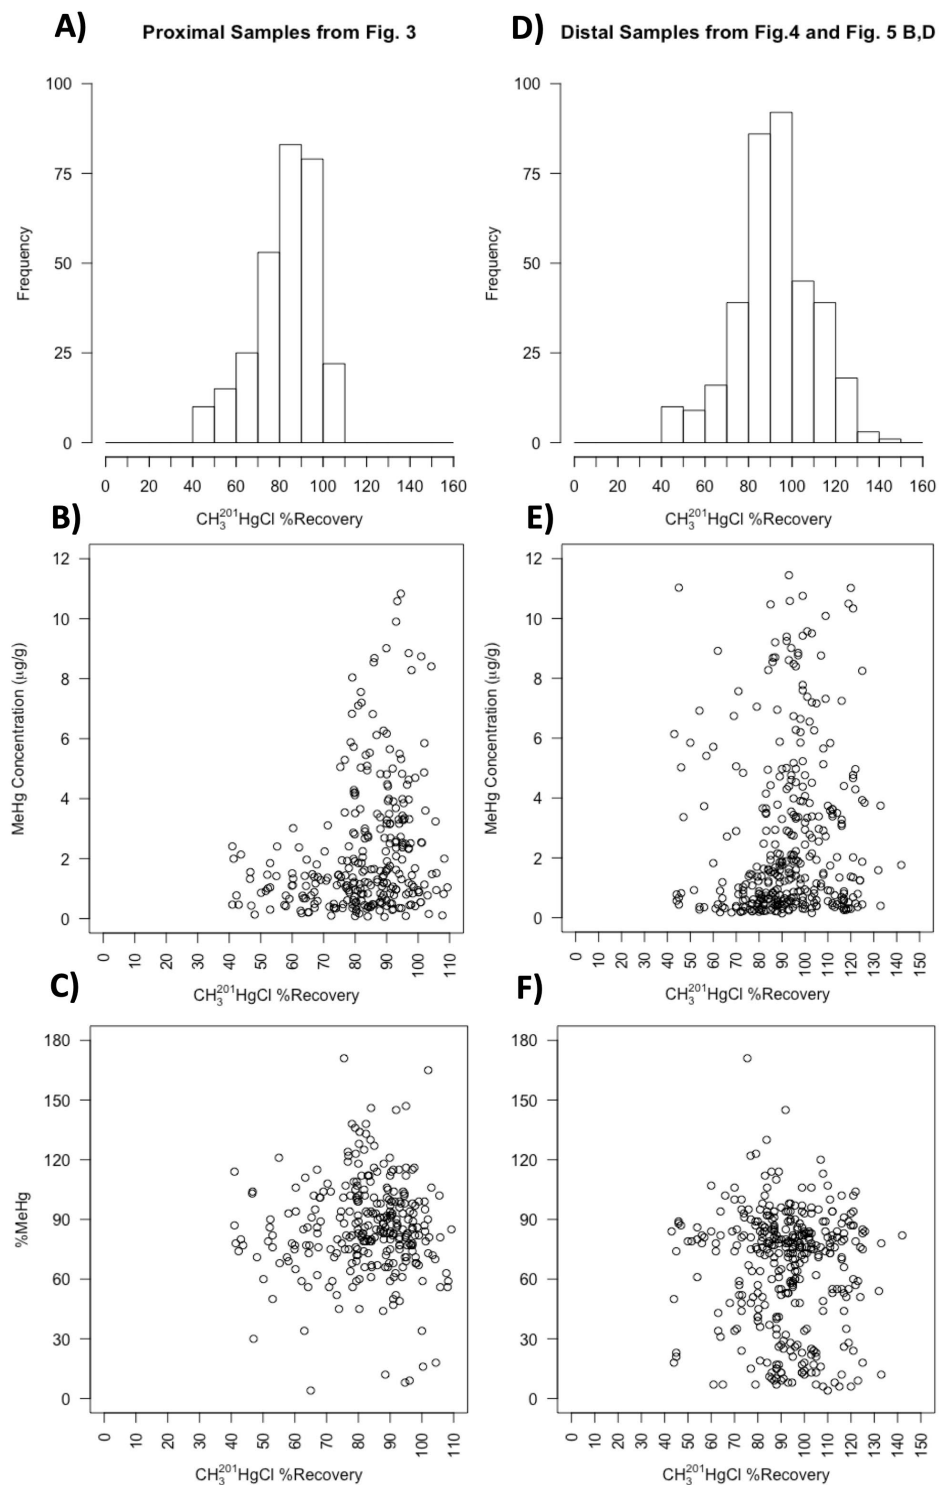

**Figure S4.** Histogram of %recovery of the CH<sub>3</sub><sup>201</sup>HgCl internal standard (IS) and relationships of this IS recovery to the measured hair MeHg contents and the percentage of the total Hg measured as MeHg for proximal hair segment samples (A-C) and distal hair segment samples (D-F).

In order to further ensure that MeHg IS recoveries were not influencing the results shown in Figure 2 of the text, we repeated our analysis with a more stringent minimum IS recovery of 70%. The change in the threshold removed 50 samples from our original analysis. This change in threshold also removed one community, Boca Isiriwe, as it only had N=1 sample in the original analysis. With this change, several key features were observed in a comparison of %MeHg plots (Figure S5). First, the outlier values (i.e. <20% and >120%MeHg) remained present with both minimum IS recovery thresholds, indicating that the outliers were not a result of low IS recovery during the analysis of these samples. Second, when the minimum IS recovery was changed from 40% to 70%, the same number of communities (16) have median %MeHg values within the expected %MeHg reference range ( $84\% \pm 18\%$ ; see Methods section of the main section of the publication). The expected %MeHg reference range is based on individuals whose only expected source of Hg exposure is dietary MeHg. Overall, these results suggest a lack of bias due to some sample analyses resulting in relatively low (40-70%) IS recovery. Regardless of the selected minimum value for IS recovery, the data show that hair THg was indicative of MeHg exposure for this population.

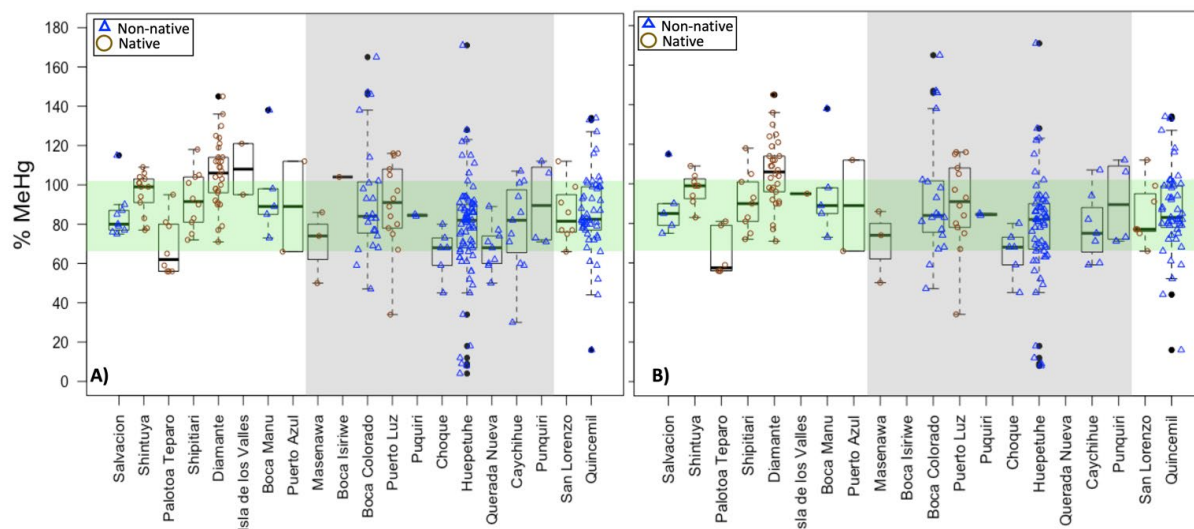

**Figure S5.** Measured hair MeHg divided by THg contents (expressed as a percentage) for each individual in the study cohort. (A) Analyses for which the recovery of the  $\text{CH}_3^{201}\text{HgCl}$  internal standard was 40% or greater (same as Figure 3 in the main text; N= 287). (B) Analyses for which the recovery of the  $\text{CH}_3^{201}\text{HgCl}$  internal standard was 70% or greater (N=237). Symbols represent measurements of individual participants and are grouped by their residence in native (open brown circles) and non-native (open blue triangles) communities. Communities in the grey shaded region lie within mining. The light green shaded region represents the expected range of %MeHg values, based on prior studies of Hg exposure for individual exposed to mercury only through diet. The black bars represent the median %MeHg value for each community, the box outline represents values in the 25<sup>th</sup> to 75<sup>th</sup> percentile, the whiskers represent values outside the middle 50%, and the closed black circles represent %MeHg values that are outliers of each community distribution. Data correspond to the proximal 2-cm hair segment.



### Section S3: Measurement Uncertainty Analysis for Hair THg and MeHg

Measurement uncertainty associated with each parameter (THg and MeHg contents in hair) was evaluated based on methods described in previous guides[17–19]. Our evaluation first entailed the quantification of uncertainty in each component of the sample analysis (e.g., sample weights, liquid aliquots, reference material measurements) by performing replicate measurements for each component. From these repeated measurements, relative uncertainties were calculated and compared to each other as a mean to identify which steps in the analysis were dominant contributors to overall uncertainty of the measured THg and MeHg contents.

#### Hair Total Mercury Uncertainty

Total mercury content in hair,  $[THg]$ , was calculated using the following equation:

$$[THg] = \frac{m_{THg}}{m_{hair}} \quad (S1)$$

where  $m_{THg}$  is the mass of THg measured for a hair sample with mass  $m_{hair}$ . The overall uncertainty of the  $[THg]$  value depended on uncertainties related to  $m_{THg}$  (i.e., instrument calibration),  $m_{hair}$ , as well as measurement bias ( $B$ ), measurement imprecision as determined by measured THg values of certified reference material ( $[THg]_{CRM}$ ), and biological variability of hair THg levels across the scalp ( $bio$ ). The standard uncertainty  $u(x)$  for each parameter  $x$ , was calculated as a relative term, as described below:

$u(m_{THg})/m_{THg}$ : The instrument signal was calibrated using aliquots of a dissolved Hg(II) standard solution, and the calibration curve was determined by least squares regression of 5 - 7 calibration points. The instrument was calibrated periodically for samples in this study. The uncertainty of the measured  $m_{THg}$  was based on average relative residual error over all calibration points ( $n$ ) that were used to determine calibration curves:

$$\frac{u(m_{THg})}{m_{THg}} = \frac{1}{n} \left( \sum_{i=1}^n \frac{m_{THg,i}^E - m_{THg,i}^P}{m_{THg,i}^E} \right) \quad (S2)$$

where the residual is the difference between the expected Hg mass  $m_{THg,i}^E$  for calibration standard  $i$  and the Hg mass  $m_{THg,i}^P$  predicted by the respective calibration curve.

$u(m_{hair})/m_{hair}$ : Prior to analysis for Hg content, the mass of hair specimen  $m_{hair}$  was quantified on a standard precision balance (Mettler Toledo AG245). The relative uncertainty associated with the mass measurement  $u(m_{hair})/m_{hair}$  was defined as the relative standard deviation (RSD) of measured mass values for six aliquots of water (0.1 mL or 100 mg) dispensed on a weigh boat on the balance.

$u(bio)/[THg]$ : For 27 individuals, THg hair measurements were performed for hair tufts collected from 3 different parts of the scalp for each individual. These triplicates were used to assess intraindividual (i.e., biological) variability for hair THg content. The RSD of the triplicate THg measurements was determined for each individual (Table S3). The relative uncertainty associated with biological variability of THg across the scalp,  $\frac{u(bio)}{[THg]}$ , was defined as the average RSD for the 27 individuals ( $\frac{u(bio)}{[THg]} = 0.113$  or 11.3%).

**Table S3.** Average hair total mercury concentrations and corresponding standard deviation (SD) and relative standard deviation (RSD) from measurement of 3 tufts of hair from an individual. The average RSD represents intraindividual variability in hair THg across the scalp. Data corresponds to the proximal 2-cm hair segment.

| Individual ID | Community      | Average Hg<br>$\overline{[THg]}$<br>$\mu g/g$ | SD<br>$\mu g/g$ | RSD   |
|---------------|----------------|-----------------------------------------------|-----------------|-------|
| BC1           | Boca Colorado  | 0.851                                         | 0.063           | 0.074 |
| BC2           | Boca Colorado  | 2.00                                          | 0.616           | 0.308 |
| BC3           | Boca Colorado  | 1.72                                          | 0.096           | 0.056 |
| BM1           | Boca Manu      | 16.84                                         | 0.397           | 0.024 |
| CH1           | Choque         | 0.625                                         | 0.037           | 0.059 |
| DM1           | Diamante       | 21.4                                          | 2.078           | 0.097 |
| DM2           | Diamante       | 19.4                                          | 1.346           | 0.069 |
| DM3           | Diamante       | 16.7                                          | 0.828           | 0.050 |
| DM4           | Diamante       | 21.3                                          | 1.910           | 0.090 |
| HU1           | Huepetuhe      | 1.02                                          | 0.006           | 0.006 |
| HU2           | Huepetuhe      | 0.319                                         | 0.032           | 0.099 |
| HU3           | Huepetuhe      | 0.848                                         | 0.620           | 0.732 |
| HU4           | Huepetuhe      | 5.794                                         | 1.01            | 0.174 |
| HU5           | Huepetuhe      | 15.9                                          | 0.538           | 0.034 |
| HU6           | Huepetuhe      | 14.6                                          | 3.10            | 0.212 |
| HU7           | Huepetuhe      | 0.574                                         | 0.014           | 0.024 |
| HU8           | Huepetuhe      | 13.3                                          | 0.042           | 0.003 |
| HU9           | Huepetuhe      | 16.7                                          | 2.30            | 0.138 |
| HU10          | Huepetuhe      | 13.0                                          | 0.579           | 0.044 |
| HU11          | Huepetuhe      | 20.5                                          | 2.30            | 0.112 |
| HU12          | Huepetuhe      | 0.765                                         | 0.120           | 0.157 |
| PN1           | Punquiri       | 0.750                                         | 0.022           | 0.030 |
| PT1           | Palotoa Teparo | 2.30                                          | 0.729           | 0.318 |
| QM1           | Quincemil      | 1.14                                          | 0.021           | 0.018 |
| SA1           | Salvacion      | 0.490                                         | 0.027           | 0.054 |
| SA2           | Salvacion      | 0.347                                         | 0.004           | 0.012 |
| SH1           | Shintuya       | 2.72                                          | 0.143           | 0.052 |
| Average:      |                |                                               |                 | 0.113 |

$u(imp)/\overline{[THg]}_{CRM}$  : Uncertainty due to imprecision was calculated based on  $[THg]_{CRM}$ , the measured Hg content of the hair certified reference material (DB001, European Reference Materials) using the following equation:

$$u(imp) = \sqrt{u_{ref}^2 + u_{rep}^2} \quad (S3)$$

where  $u_{ref}$  is the standard uncertainty associated with the reference material (from the CRM certificate), and  $u_{rep}$  is the standard error of the mean of replicate (N=308) CRM measurements. The relative uncertainty was then calculated by normalizing the value for  $u(imp)$  to the average THg measured in the CRM ( $\overline{[THg]}_{CRM}$ ).

$u(B)/B$ : Bias ( $B$ ) refers to the systematic error of a measurement and can be assessed from repeated measurement of a known reference material[17, 18, 20, 21]. Here, we defined  $B$  as the average recovery of the measured THg relative to the certified THg value (0.365 mg/kg) for the hair CRM (averaged over N=308 separate measurements).  $B=100\%$  recovery would indicate

no bias. The uncertainty of the bias  $u(B)$  was calculated from the standard error of the mean of the THg CRM recoveries.

Altogether, the relative standard uncertainty for hair THg (Table S3) was calculated according to the following:

$$\frac{u([THg])}{[THg]} = k \sqrt{\left(\frac{u(m_{THg})}{m_{THg}}\right)^2 + \left(\frac{u(m_{hair})}{m_{hair}}\right)^2 + \left(\frac{u(bio)}{[THg]}\right)^2 + \left(\frac{u(imp)}{[THg_{CRM}]}\right)^2 + \left(\frac{u(B)}{B}\right)^2} \quad (S4)$$

where  $u([THg])$  is the standard uncertainty of the hair THg content ( $[THg]$ ), and  $k$  is the coverage factor ( $k=1.96$  to obtain a confidence level of 95%).

**Table S4.** Relative standard uncertainty for contributing components of the hair THg analysis.

|                                | Calibration                  | Sample Weight                  | Biological             | Precision                    | Bias             | Total Relative Uncertainty (95% confidence level) |
|--------------------------------|------------------------------|--------------------------------|------------------------|------------------------------|------------------|---------------------------------------------------|
|                                | $\frac{u(m_{THg})}{m_{THg}}$ | $\frac{u(m_{hair})}{m_{hair}}$ | $\frac{u(bio)}{[THg]}$ | $\frac{u(imp)}{[THg_{CRM}]}$ | $\frac{u(B)}{B}$ | $\frac{u([THg])}{[THg]}$                          |
| Relative uncertainty value (%) | 2.96                         | 0.443                          | 11.3                   | 3.94                         | 0.402            | 24.2                                              |

### Hair Methylmercury Uncertainty

The measured hair methylmercury content  $[MeHg]$  (in  $\mu\text{g/g}$ ) was calculated according to the following:

$$[MeHg] = \frac{m_{MeHg}}{m_{hair}} = \frac{m_{198}}{R_{201}A_{201}} \times \frac{V_T}{V_a} \quad (S5)$$

where  $m_{MeHg}$  is the mass of MeHg measured in a digested hair specimen of mass  $m_{hair}$ . The mass for the  $\text{Me}^{198}\text{Hg}$  isotope ( $m_{198}$ ) was used for the sample MeHg and was adjusted based on the recovery  $R_{201}$  of the  $\text{Me}^{201}\text{Hg}$  internal standard, the natural relative abundance of the  $^{201}\text{Hg}$  isotope ( $A_{201}=0.1318$ ), and corrections for aliquots of the extracts as represented by  $V_T$  and  $V_a$ , the total sample volume and analyzed aliquot volume, respectively. Relative uncertainties for all of these parameters were evaluated, with the exception of  $A_{201}$  as it is a widely accepted value. These relative uncertainties included:

$u(m_{198})/m_{198}$  and  $u(m_{201})/m_{201}$ : Relative uncertainty of measured  $\text{Me}^{198}\text{Hg}$  and  $\text{Me}^{201}\text{Hg}$  was based on the average residual error of calibration points for the  $\text{Me}^{198}\text{Hg}$  and  $\text{Me}^{201}\text{Hg}$  calibration curves, as described in Equation S2.

$u(m_{hair})/m_{hair}$ : The relative uncertainty associated with the mass of the hair specimen was calculated from the RSD of 8 repeated measures of a hair sample on the high precision microbalance (Mettler Toledo XP26) used for the hair samples.

$u(\forall_T)/\forall_T$  and  $u(\forall_a)/\forall_a$ : All volumes were determined gravimetrically. Therefore, the RSD was calculated from 6 repeated mass measurements each of a low (100  $\mu\text{L}$ ) and a high (1 mL) volume of water. This range corresponds to the order of magnitude of  $\forall_a$  and  $\forall_T$ , respectively.

$u(\text{imp})/[\text{MeHg}]_{\text{RM}}$ : Uncertainty due to imprecision was calculated as described for  $u(\text{imp})/[\text{THg}]_{\text{CRM}}$ , except with N=50 measurements of a MeHg hair reference material (RM) (International Atomic Energy Agency-086).

$u(B)/B$ : Bias ( $B$ ) was defined as the mean MeHg recovery for N=50 separate measurements of the RM - i.e., the measured  $[\text{MeHg}]_{\text{RM}}$  relative to the certified  $[\text{MeHg}]_{\text{RM}}$  value (0.258  $\mu\text{g/g}$ ). The uncertainty of the bias  $u(B)$  was calculated from the standard error of the mean  $B$ .

Intraindividual variability of hair MeHg (i.e. biological variability) could not be included due to insufficient sample mass for replicate hair MeHg for each individual. Altogether, the relative standard uncertainty at 95% confidence level for the hair MeHg measurement, shown in Table S4 was calculated according to:

$$\frac{u([\text{MeHg}])}{[\text{MeHg}]} = k \sqrt{\left(\frac{u(m_{198})}{m_{198}}\right)^2 + \left(\frac{u(m_{201})}{m_{201}}\right)^2 + \left(\frac{u(m_{\text{hair}})}{m_{\text{hair}}}\right)^2 + \left(\frac{u(\forall_T)}{\forall_T}\right)^2 + \left(\frac{u(\forall_a)}{\forall_a}\right)^2 + \left(\frac{u(\text{imp})}{[\text{MeHg}]_{\text{RM}}}\right)^2 + \left(\frac{u(B)}{B}\right)^2} \quad (\text{S6})$$

where  $u([\text{MeHg}])$  is the total standard uncertainty of the measured hair MeHg content  $[\text{MeHg}]$ .

**Table S5.** Relative standard uncertainty for components of the hair MeHg analysis protocol.

|                                      | Calibration<br>$m_{198}$     | Calibration<br>$m_{201}$     | Sample<br>Weight                             | Total<br>Volume                  | Aliquot<br>Volume                | Precision                                         | Bias             | Total Relative<br>Uncertainty<br>(95% confidence<br>level) |
|--------------------------------------|------------------------------|------------------------------|----------------------------------------------|----------------------------------|----------------------------------|---------------------------------------------------|------------------|------------------------------------------------------------|
|                                      | $\frac{u(m_{198})}{m_{198}}$ | $\frac{u(m_{201})}{m_{201}}$ | $\frac{u(m_{\text{hair}})}{m_{\text{hair}}}$ | $\frac{u(\forall_T)}{\forall_T}$ | $\frac{u(\forall_a)}{\forall_a}$ | $\frac{u(\text{imp})}{[\text{MeHg}]_{\text{RM}}}$ | $\frac{u(B)}{B}$ | $\frac{u([\text{MeHg}])}{[\text{MeHg}]}$                   |
| Relative<br>uncertainty<br>value (%) | 4.85                         | 2.80                         | 0.122                                        | 0.299                            | 0.443                            | 4.37                                              | 1.20             | 14.2                                                       |

As shown in Table S4 and S5, the relative uncertainty of the hair THg analysis was greater than the relative uncertainty of the MeHg. Note that all of the contributing uncertainties from the analysis protocol for both  $[\text{THg}]$  and  $[\text{MeHg}]$  were less than 5%. The exception was biological variability (i.e. intraindividual variability) for hair THg, with a relative uncertainty of 11.3%. Intraindividual variability was not available for the MeHg measurements. Altogether, this uncertainty analysis shows that intraindividual variation (i.e. biological variability in THg between tufts of hair) was the main contributor to overall uncertainty in the hair THg measurements.

#### Section S4: Hair Segment Analysis

Multiple individuals were found to have %MeHg values over 100% in proximal hair segments even though %MeHg values are theoretically bound between 0 and 100%. Note that these values are based on two different tufts of hair from the same individual and that intraindividual variability (e.g., Different hair follicle growth rates [2]) could contribute to variable levels of hair THg across the scalp. For example, in a subset of individuals (N= 27) from the parent study, triplicate hair samples from each individual were analyzed for THg. The relative standard deviation for THg of the three hair tufts was 11.3% (Table S3), which exceeds the relative standard uncertainty from all other components involved in measurement of THg and MeHg (SI Section 3; Table S4 and S5). (Triplicate samples for MeHg analysis were not available.) Furthermore, in our analysis of homogenized distal hair segments, the %MeHg values were all below 105% for the individuals tested (Figure S6).

For the N=8 individuals with %MeHg = 105% to 170% in the proximal non-homogenized segment, the adjacent (homogenized) distal segment had %MeHg values within the reference range (Figure S6, red markers). Seven of these 8 individuals did not recently travel outside the community, which could change the %MeHg levels. Thus, the change in %MeHg levels between the proximal and distal segments was likely due to analysis with a homogenized sample.

For the N=6 individuals with %MeHg < 66% in proximal hair segments, the %MeHg value remained below the reference range for %MeHg in the second segment for 5 of these individuals (Figure S6, yellow markers). For individuals with proximal %MeHg between 66%-102%, 8 of 9 individuals remained within the %MeHg reference range for %MeHg in the second segment (Figure S6, green markers). This consistency between the proximal and second segment suggests that the proximal %MeHg <102% in Figure 2C are not explained by intraindividual variability, contrary to observations of proximal %MeHg values greater than 102%. These results highlight the value in utilizing splits of homogenized hair sample for analysis of multiple analytes.

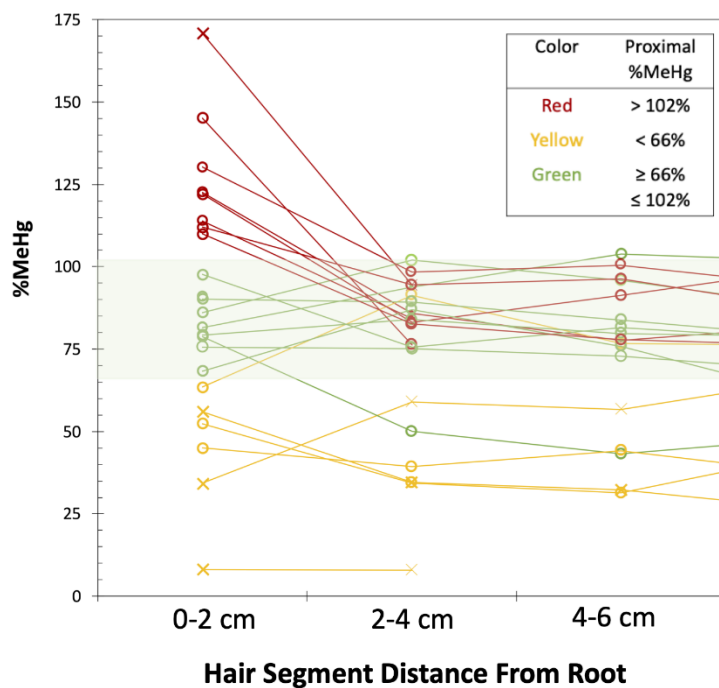

**Figure S6.** %MeHg values for 2-cm hair segments for individuals from 2 communities: Diamante, a native non-mining community (N=15) and Huepetuhe, an urban mining community (N=8). Each line represents 1 female participant in the study, and each symbol is the %MeHg of a 2-cm segment, assumed to represent 2 months of hair growth. The light green shaded region represents the expected range of %MeHg values (66%-102%), based on prior studies of Hg exposure for individual exposed to mercury only through diet. Participants are therefore designated into one of the following groups based on their proximal %MeHg value: %MeHg < 66% (yellow; N = 6); 66% ≤ %MeHg ≤ 102% (green; N = 9); %MeHg > 102% (red; N = 8). Samples at 0-2cm correspond to the proximal segment (i.e. closest to the scalp) and different hair tufts for THg and MeHg analyses. Samples at 2-4cm correspond to two hair tufts that were homogenized and split for THg and MeHg analysis. Individuals who are in the non-migration cohort are denoted with the circle (o) symbol.

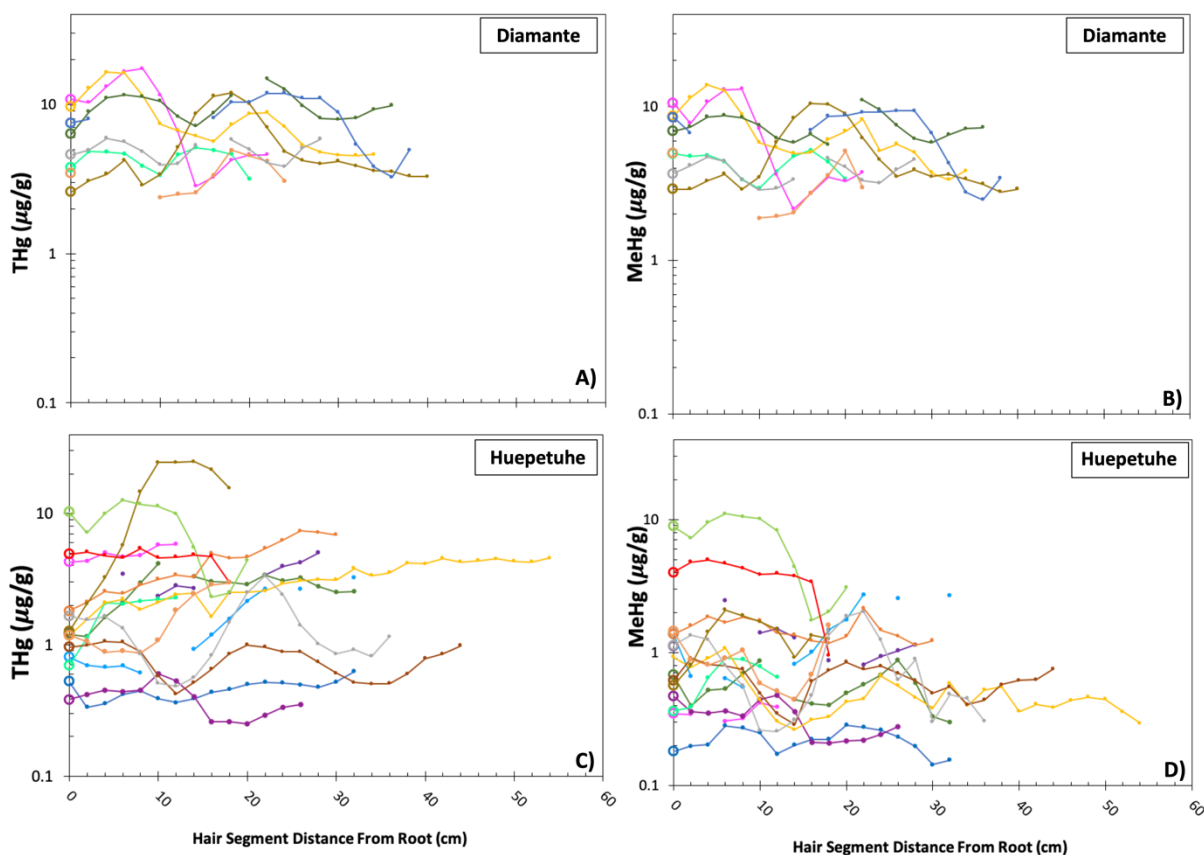

**Figure S7.** Total mercury and methylmercury contents for 2-cm hair segments from individuals living in: A, B) Diamante, a native non-mining community; and C,D) Huepetuhe, an urban mining community. Each line represents 1 female participant in the study, and each symbol is the THg or MeHg of a 2-cm segment, assumed to represent 2 months of hair growth. Open circles (at 0-2 cm) correspond to the proximal segment (i.e. closest to the scalp) and samples that were not homogenized and split prior to THg and MeHg analysis. Closed circles correspond to composite hair samples that were homogenized and split for THg and MeHg analysis. Gaps in line are due to measurements that could not be completed due to inadequate sample mass.

## Section S5. Statistical Analyses: Predictors of Hair THg and MeHg content

**Table S6.** Description of predictor variables used in mixed effect models.

| Variable             | Subsample (N=287) |    | Population <sup>[22]</sup> (N = 1543) |    |
|----------------------|-------------------|----|---------------------------------------|----|
|                      | N                 | %  | N                                     | %  |
| <b>Sex</b>           |                   |    |                                       |    |
| Male                 | 84                | 29 | 473                                   | 31 |
| Female               | 203               | 71 | 1070                                  | 69 |
| <b>Age</b>           |                   |    |                                       |    |
| <31                  | 106               | 37 | 692                                   | 45 |
| 31-50                | 124               | 43 | 576                                   | 37 |
| > 50                 | 57                | 20 | 275                                   | 18 |
| <b>Within Mining</b> |                   |    |                                       |    |
| Yes                  | 150               | 52 | 797                                   | 52 |
| No                   | 137               | 48 | 746                                   | 48 |
| <b>Nativity</b>      |                   |    |                                       |    |
| Yes                  | 88                | 31 | 358                                   | 23 |
| No                   | 199               | 69 | 1185                                  | 77 |
| <b>Occupation</b>    |                   |    |                                       |    |
| Mining               | 14                | 5  | 72                                    | 5  |
| Agriculture/Fishing  | 31                | 11 | 141                                   | 9  |
| Other Outdoor        | 12                | 4  | 49                                    | 3  |
| Professional/Urban   | 81                | 28 | 339                                   | 22 |
| Self-employed/Other  | 42                | 15 | 265                                   | 17 |
| No Job/Not Reported  | 107               | 37 | 677                                   | 44 |



**Table S7.** Mixed effects models showing determinants of hair total mercury levels. Mixed effects models entailed natural log-transformed hair THg content as the outcome variable and age, sex, residence in native community, occupation, and residence in a mining community as predictor variables, with random intercepts for community-level variance. To determine inclusion in a multivariate linear regression model, the bivariate association between each predictor variable and outcome hair THg were tested. Predictor variables were included in the multivariate analysis if the bivariate association tested significant ( $P < 0.20$ ). Abbreviations: coefficient estimate ( $\beta$ ), confidence interval (CI), yes (Y).

|                                 | ln (THg hair, $\mu\text{g/g}$ )<br>bivariate analysis |        |        |        | ln (THg hair, $\mu\text{g/g}$ )<br>multivariate analysis |         |        |        |
|---------------------------------|-------------------------------------------------------|--------|--------|--------|----------------------------------------------------------|---------|--------|--------|
|                                 | $\beta$                                               | P      | 95% CI |        | $\beta$                                                  | P Value | 95% CI |        |
| <b>Intercept</b>                | -----                                                 | -----  | -----  | -----  | 0.53                                                     | 0.035   | 0.089  | 0.96   |
| <b>Age (30-50)<sup>1</sup></b>  | 0.24                                                  | 0.021  | 0.038  | 0.45   | 0.20                                                     | 0.057   | -0.007 | 0.40   |
| <b>Age (&gt;50)<sup>1</sup></b> | -0.13                                                 | 0.34   | -0.38  | 0.13   | -0.21                                                    | 0.13    | -0.48  | 0.061  |
| <b>Sex (Female)</b>             | -0.20                                                 | 0.058  | -0.41  | 0.0056 | -0.27                                                    | 0.015   | -0.49  | -0.061 |
| <b>Native (Y)</b>               | 0.84                                                  | 0.0017 | 0.42   | 1.2    | 0.78                                                     | 0.0065  | 0.32   | 1.21   |
| <b>Within Mining (Y)</b>        | -0.37                                                 | 0.21   | -0.92  | 0.19   | -0.018                                                   | 0.94    | -0.46  | 0.42   |
| <b>Occupation<sup>2</sup></b>   |                                                       |        |        |        |                                                          |         |        |        |
| <b>Mining</b>                   | 0.085                                                 | 0.73   | -0.40  | 0.59   |                                                          |         |        |        |
| <b>Agriculture/Fishing</b>      | -0.041                                                | 0.82   | -0.39  | 0.31   |                                                          |         |        |        |
| <b>Other Outdoor</b>            | 0.12                                                  | 0.64   | -0.37  | 0.61   |                                                          |         |        |        |
| <b>Professional/Urban</b>       | -0.081                                                | 0.51   | -0.32  | 0.16   |                                                          |         |        |        |
| <b>Own Job/Other</b>            | 0.024                                                 | 0.87   | -0.27  | 0.32   |                                                          |         |        |        |

<sup>1</sup>reference: Age <30 years    <sup>2</sup>reference: unemployed

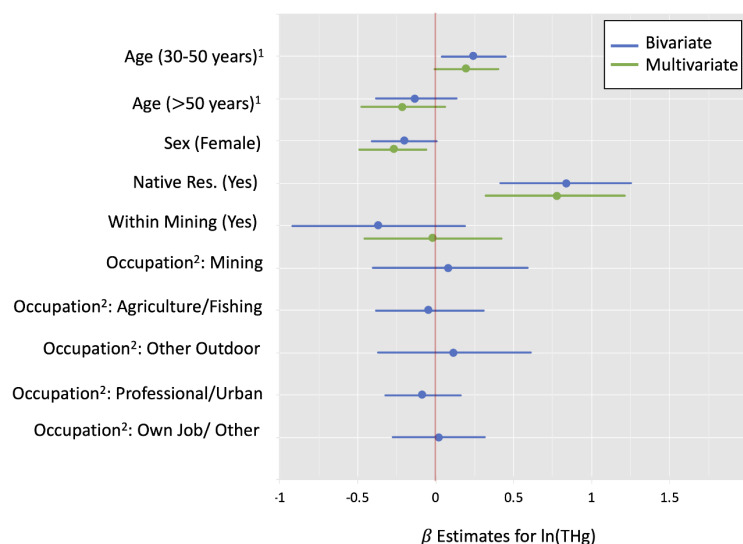

**Figure S8.** Determinants of hair total mercury levels shown as coefficient  $\beta$  estimates (circles) and 95% confidence interval (whiskers) for bivariate (blue) and multivariate (green) mixed effects models. <sup>1</sup>reference level: Age <30 years; <sup>2</sup>reference level: unemployed.

**Table S8.** Mixed effects models showing determinants of hair MeHg levels. The mixed effects models entailed natural log-transformed hair MeHg content as the outcome variable and age, sex, residence in native community, occupation, and residence in a mining community as predictor variables, with random intercepts for community-level variance. To determine inclusion in a multivariate linear regression model, the bivariate association between each predictor variable and outcome hair MeHg were tested. Predictor variables were included in the multivariate analysis if the bivariate association tested significant ( $P < 0.20$ ). Abbreviations : coefficient estimate ( $\beta$ ), confidence interval (CI), yes (Y).

|                          | ln (MeHg hair, $\mu\text{g/g}$ ),<br>bivariate analysis |         |        |       | ln (MeHg hair, $\mu\text{g/g}$ ),<br>multivariate analysis |         |        |       |
|--------------------------|---------------------------------------------------------|---------|--------|-------|------------------------------------------------------------|---------|--------|-------|
|                          | $\beta$                                                 | P Value | 95% CI |       | $\beta$                                                    | P Value | 95% CI |       |
| Intercept                | -----                                                   | -----   | -----  | ----- | 0.20                                                       | 0.46    | -0.30  | 0.70  |
| Age (30-50) <sup>1</sup> | 0.25                                                    | 0.018   | 0.044  | 0.46  | 0.25                                                       | 0.020   | 0.039  | 0.45  |
| Age(>50) <sup>1</sup>    | -0.058                                                  | 0.66    | -0.32  | 0.20  | -0.036                                                     | 0.79    | -0.29  | 0.23  |
| Sex (Female)             | -0.13                                                   | 0.22    | -0.34  | 0.077 | -----                                                      | -----   | -----  | ----- |
| Native (Y)               | 0.88                                                    | 0.0036  | 0.38   | 1.4   | 0.80                                                       | 0.020   | 0.21   | 1.3   |
| Within Mining (Y)        | -0.50                                                   | 0.12    | -1.1   | 0.10  | -0.18                                                      | 0.56    | -0.73  | 0.37  |
| Occupation <sup>2</sup>  |                                                         |         |        |       |                                                            |         |        |       |
| Mining                   | 0.26                                                    | 0.30    | -0.23  | 0.76  |                                                            |         |        |       |
| Agriculture/Fishing      | 0.032                                                   | 0.86    | -0.31  | 0.38  |                                                            |         |        |       |
| Other Outdoor            | 0.17                                                    | 0.50    | -0.32  | 0.66  |                                                            |         |        |       |
| Professional/Urban       | 0.019                                                   | 0.88    | -0.22  | 0.26  |                                                            |         |        |       |
| Own Job/Other            | 0.12                                                    | 0.42    | -0.18  | 0.41  |                                                            |         |        |       |

<sup>1</sup>reference: Age <30 years    <sup>2</sup>reference: unemployed

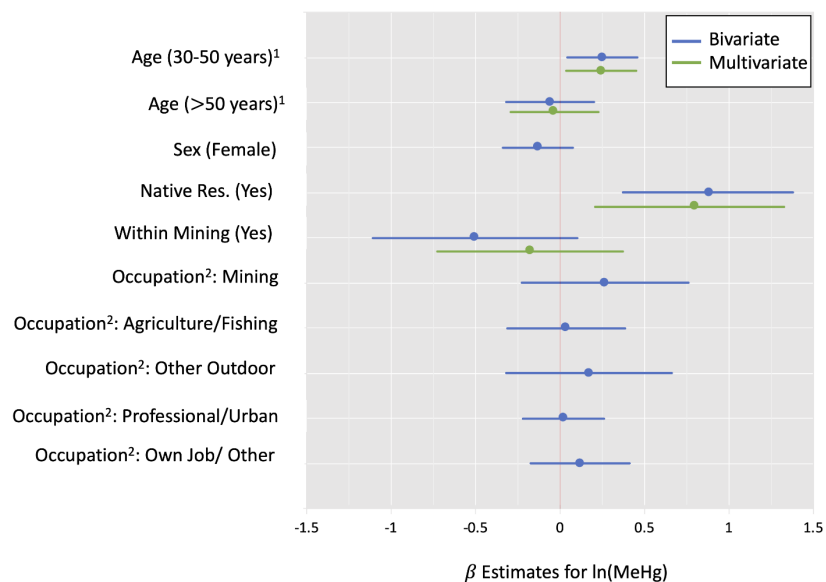

**Figure S9.** Determinants of hair methylmercury levels shown as coefficient  $\beta$  estimates (circles) and corresponding 95% confidence interval (whiskers) for bivariate (blue) and multivariate (green) mixed effects models. <sup>1</sup>reference level: Age <30 years; <sup>2</sup>reference level: unemployed.

**Table S9.** Mixed effects models showing determinants of hair %MeHg levels. The mixed effects models entailed the natural log-transformed hair %MeHg content as the outcome variable and age, sex, residence in native community, occupation, and residence in a mining community as predictor variables, with random intercepts for community-level variance. To determine inclusion in a multivariate linear regression model, the bivariate association between each predictor variable and outcome hair %MeHg were tested. Predictor variables were included in the multivariate analysis if the bivariate association tested significant ( $P < 0.20$ ). Abbreviations : coefficient estimate ( $\beta$ ), confidence interval (CI), yes (Y).

|                          | ln (%MeHg hair)<br>bivariate analysis |         |        |        | ln (%MeHg hair)<br>multivariate |         |        |        |
|--------------------------|---------------------------------------|---------|--------|--------|---------------------------------|---------|--------|--------|
|                          | $\beta$                               | P Value | 95% CI |        | $\beta$                         | P Value | 95% CI |        |
| Intercept                | -----                                 | -----   | -----  | -----  | 4.4                             | 2e-16   | 4.3    | 4.5    |
| Age (30-50) <sup>1</sup> | 0.026                                 | 0.62    | -0.076 | 0.13   | -----                           | -----   | -----  | -----  |
| Age(>50) <sup>1</sup>    | 0.086                                 | 0.19    | -0.042 | 0.21   | -----                           | -----   | -----  | -----  |
| Sex (Female)             | 0.048                                 | 0.35    | -0.052 | 0.15   | -----                           | -----   | -----  | -----  |
| Native (Y)               | 0.11                                  | 0.13    | -0.034 | 0.25   | 0.057                           | 0.41    | -0.095 | 0.21   |
| Within Mining (Y)        | -0.16                                 | 0.046   | -0.27  | -0.013 | -0.14                           | 0.12    | -0.28  | 0.0012 |
| Occupation <sup>2</sup>  |                                       |         |        |        |                                 |         |        |        |
| Mining                   | 0.16                                  | 0.16    | -0.062 | 0.39   | 0.19                            | 0.11    | -0.039 | 0.41   |
| Agriculture/Fishing      | 0.098                                 | 0.24    | -0.063 | 0.26   | 0.058                           | 0.49    | -0.11  | 0.22   |
| Other Outdoor            | 0.072                                 | 0.55    | -0.16  | 0.31   | 0.069                           | 0.57    | -0.16  | 0.31   |
| Professional/Urban       | 0.094                                 | 0.11    | -0.021 | 0.21   | 0.10                            | 0.093   | -0.014 | 0.21   |
| Own Job/Other            | 0.029                                 | 0.69    | -0.12  | 0.17   | 0.040                           | 0.59    | -0.11  | 0.18   |

<sup>1</sup>reference: Age <30 years    <sup>2</sup>reference: unemployed

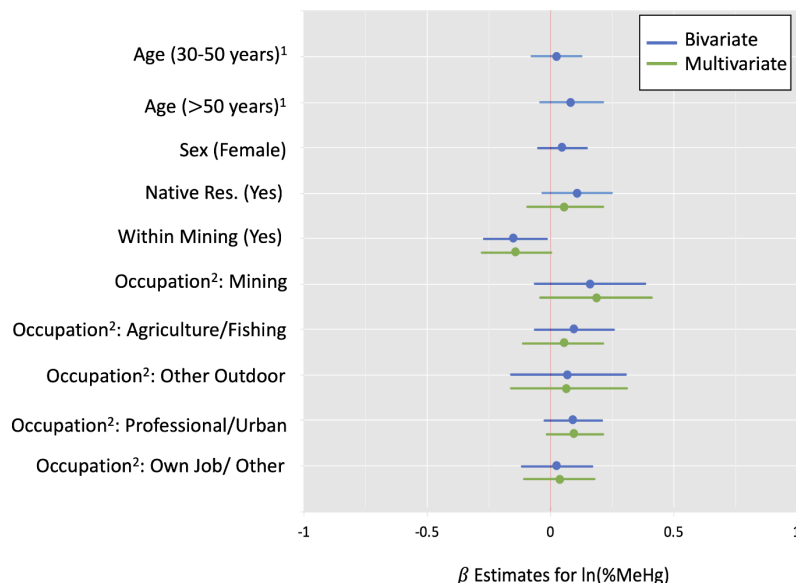

**Figure S10.** Determinants of hair %MeHg values shown as coefficient  $\beta$  estimates (circles) and corresponding 95% confidence interval (whiskers) for bivariate (blue) and multivariate (green) mixed effects models. <sup>1</sup>reference level: Age <30 years; <sup>2</sup>reference level: unemployed.

**Table S10.** Odds ratios (OR) for an individual within a mining community having hair %MeHg <66% based on age, sex, residence in native community, and occupation variables. Random intercepts were used to adjust for community-level variance. P-values are compared to an individual with hair %MeHg ≥66. To determine inclusion in a multivariate logistic model, the bivariate association between each predictor variable and outcome hair %MeHg were tested. Predictor variables were included in the multivariate analysis if the bivariate association tested significant ( $P < 0.20$ ). Abbreviations : confidence interval (CI), yes (Y).

|                                | %MeHg <66 vs ≥66%<br>bivariate analysis |         |        |       | %MeHg <66 vs ≥66%<br>multivariate |         |        |       |
|--------------------------------|-----------------------------------------|---------|--------|-------|-----------------------------------|---------|--------|-------|
|                                | OR                                      | P Value | 95% CI |       | OR                                | P Value | 95% CI |       |
| <b>Intercept</b>               | -----                                   | -----   | -----  | ----- | 1.3                               | 0.64    | 0.41   | 4.2   |
| <b>Age (30-50)<sup>1</sup></b> | 1.2                                     | 0.72    | 0.48   | 2.9   | -----                             | -----   | -----  | ----- |
| <b>Age(&gt;50)<sup>1</sup></b> | 0.80                                    | 0.74    | 0.25   | 2.6   | -----                             | -----   | -----  | ----- |
| <b>Sex (Female)</b>            | 0.55                                    | 0.17    | 0.24   | 1.3   | 0.24                              | 0.011   | 0.082  | 0.72  |
| <b>Native Ethnicity (Y)</b>    | 0.52                                    | 0.41    | 0.11   | 2.4   | -----                             | -----   | -----  | ----- |
| <b>Occupation<sup>2</sup></b>  |                                         |         |        |       |                                   |         |        |       |
| <b>Mining</b>                  | 0.23                                    | 0.17    | 0.027  | 1.9   | 0.067                             | 0.024   | 0.006  | 0.70  |
| <b>Agriculture/Fishing</b>     | 1.4                                     | 0.74    | 0.22   | 8.2   | 0.56                              | 0.57    | 0.074  | 4.2   |
| <b>Other Outdoor</b>           | 0.68                                    | 0.74    | 0.070  | 6.6   | 0.19                              | 0.19    | 0.016  | 2.3   |
| <b>Professional/Urban</b>      | 0.40                                    | 0.086   | 0.14   | 1.1   | 0.25                              | 0.022   | 0.077  | 0.82  |
| <b>Own Job/Other</b>           | 0.62                                    | 0.41    | 0.20   | 1.9   | 0.43                              | 0.19    | 0.13   | 1.5   |

<sup>1</sup>reference: Age <30 years    <sup>2</sup>reference: unemployed

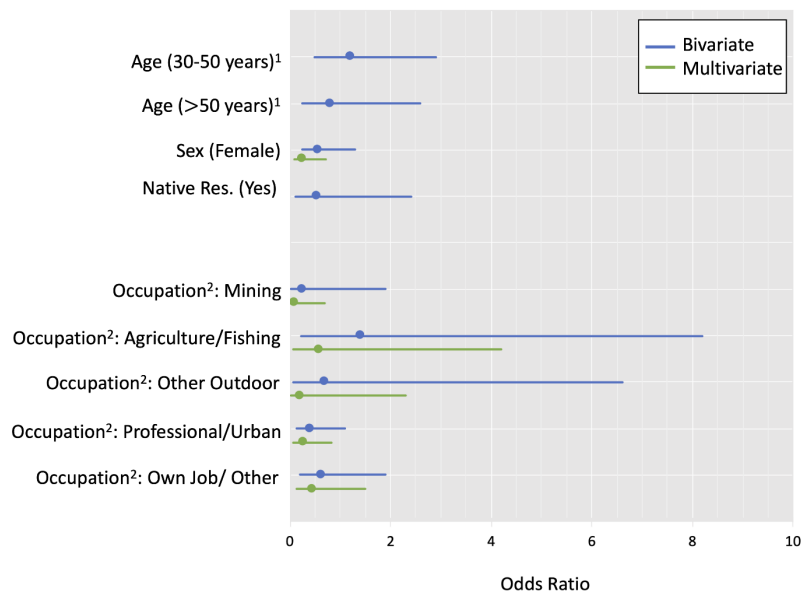

**Figure S11.** Odds ratio (circles) and 95% confidence interval (whiskers) for an individual within a mining community having hair %MeHg <66% based on predictor variables. Bivariate logistic regression results in are blue, and multivariate logistic regression models are in green. <sup>1</sup>reference level: Age <30 years; <sup>2</sup>reference level: unemployed.

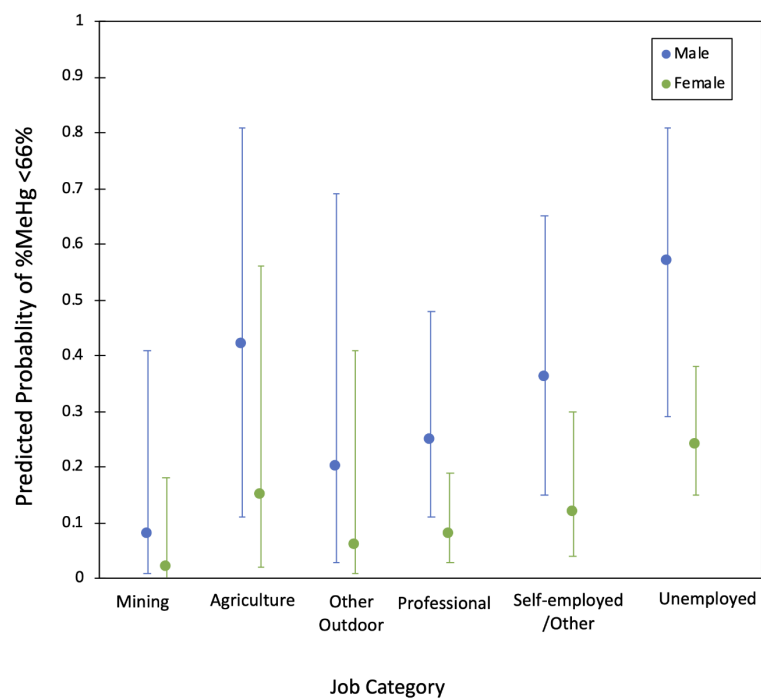

**Figure S12.** Predicted probabilities (circles) and 95% confidence interval (whiskers) of having hair %MeHg <66% by occupation and sex.

**Table S11.** Pearson correlations between natural log (ln) transformed hair total mercury and methylmercury contents by community groupings.

| <b>Community</b>   | <b>N<br/>individuals</b> | <b>THg-MeHg Hair<br/>Correlations (r)</b> |
|--------------------|--------------------------|-------------------------------------------|
| All                | 287                      | 0.92                                      |
| Within Mining      | 150                      | 0.87                                      |
| Outside Mining     | 137                      | 0.97                                      |
| Native             | 88                       | 0.94                                      |
| Non-native         | 199                      | 0.89                                      |
| Salvacion          | 9                        | 0.97                                      |
| Shintuya           | 13                       | 0.98                                      |
| Palotoa Teparo     | 8                        | 0.90                                      |
| Shipitiari         | 10                       | 0.93                                      |
| Diamante           | 30                       | 0.93                                      |
| Isla de los Valles | 2                        | NA                                        |
| Boca Manu          | 5                        | 0.92                                      |
| Puerto Azul        | 1                        | NA                                        |
| Masenawa           | 3                        | 0.43*                                     |
| Boca Isiriwe       | 1                        | NA                                        |
| Boca Colorado      | 23                       | 0.89                                      |
| Puerto Luz         | 14                       | 0.75                                      |
| Choque             | 6                        | 0.97                                      |
| Huepethue          | 77                       | 0.83                                      |
| Puquiri            | 2                        | NA                                        |
| Querada Nueva      | 9                        | 0.98                                      |
| Caychihue          | 11                       | 0.89                                      |
| Punquiri           | 4                        | 0.93                                      |
| San Lorenzo        | 8                        | 0.97                                      |
| Quincemil          | 50                       | 0.97                                      |

\*not significant

## Supplementary Information References

1. Sherman, L. S.; Blum, J. D.; Basu, N.; Rajaei, M.; Evers, D. C.; Buck, D. G.; Petrlik, J.; DiGangi, J. Assessment of Mercury Exposure among Small-Scale Gold Miners Using Mercury Stable Isotopes. *Environ. Res.* **2015**, *137*, pp. 226–234. <https://doi.org/10.1016/j.envres.2014.12.021>.
2. Laffont, L.; Sonke, J. E.; Maurice, L.; Monrroy, S. L.; Chincheros, J.; Amouroux, D.; Behra, P.; Monso, E.; Toulouse, F.-.; Cedex, F.-P. A. U. Hg Speciation and Stable Isotope Signatures in Human Hair As a Tracer for Dietary and Occupational Exposure to Mercury. *Environ. Sci. Technol.* **2011**, *45*, pp. 9910–9916.
3. Harada, M.; Nakachi, S.; Cheu, T.; Hamada, H.; Ono, Y.; Tsuda, T.; Yanagida, K.; Kizaki, T.; Ohno, H. Monitoring of Mercury Pollution in Tanzania: Relation between Head Hair Mercury and Health. *Sci. Total Environ.* **1999**, *227*, 2–3, pp. 249–256. [https://doi.org/10.1016/S0048-9697\(99\)00031-5](https://doi.org/10.1016/S0048-9697(99)00031-5).
4. Akagi, H.; Malm, O.; Branchesb, F. J. P.; Kinjoa, Y.; Kashima, Y.; Guimaraes, J.; Oliveira, R.; Haraguchi, K.; Pfeiffer, W.; Takizawa, Y.; Kato, H. Human Exposure to Mercury Due to Goldmining in the Tapajos River Basin, Amazon, Brazil: Speciation of Mercury in Human Hair, Blood, and Urine. *Water. Air. Soil Pollut.* **1995**, *80*, pp. 85–94.
5. Ikingura, J. R.; Akagib, H. Monitoring of Fish and Human Exposure to Mercury Due to Gold Mining in the Lake Victoria Goldfields , Tanzania. **1996**, *9697*, 96.
6. Malm, O.; Branchesb, F. J. P.; Akagi, H.; Castro, M.; Pfeiffer, W. C.; Haradac, M.; Bastosa, W. R.; Katob, H. Mercury and Methylmercury in Fish and Human Hair from the Tapajos River Basin, Brazil. *Sci. Total Environ.* **1995**, *175*, pp. 141–150.
7. Gao, Y.; De Galan, S.; De Brauwere, A.; Baeyens, W.; Leermakers, M. Mercury Speciation in Hair by Headspace Injection-Gas Chromatography-Atomic Fluorescence Spectrometry (Methylmercury) and Combustion-Atomic Absorption Spectrometry (Total Hg). *Talanta* **2010**, *82*, 5, pp. 1919–1923. <https://doi.org/10.1016/j.talanta.2010.08.012>.
8. Kehrig, A.; Malm, O.; Akagi, H.; Guimara, J. R. D.; Torres, P. M. Methylmercury in Fish and Hair Samples from the Balbina Reservoir , Brazilian Amazon. **1998**, *90*, 77, pp. 84–90.
9. Dermelj, M.; Horvat, M.; Byrne, A. R.; Stegnar, P. Mercury, Methyl-Mercury, and Selenium in Scalp Hair of Inhabitants from Mediterranean Areas. *Chemosphere* **1987**, *16*, 4, pp. 877–886.
10. Laffont, L.; Sonke, J. E.; Maurice, L.; Monrroy, S. L.; Chincheros, J.; Amouroux, D.; Behra, P. Hg Speciation and Stable Isotope Signatures in Human Hair as a Tracer for Dietary and Occupational Exposure to Mercury. *Environ. Sci. Technol.* **2011**, *45*, 23, pp. 9910–9916. <https://doi.org/10.1021/es202353m>.
11. Al-Majed, N. B.; Preston, M. R. Factors Influencing the Total Mercury and Methyl Mercury in the Hair of the Fishermen of Kuwait. *Environ. Pollut.* **2000**, *109*, 2, pp. 239–250. [https://doi.org/10.1016/S0269-7491\(99\)00261-4](https://doi.org/10.1016/S0269-7491(99)00261-4).
12. Díez, S.; Delgado, S.; Aguilera, I.; Astray, J.; Pérez-Gómez, B.; Torrent, M.; Sunyer, J.; Bayona, J. M. Prenatal and Early Childhood Exposure to Mercury and Methylmercury in Spain, a High-Fish-Consumer Country. *Arch. Environ. Contam. Toxicol.* **2009**, *56*, 3, pp. 615–622. <https://doi.org/10.1007/s00244-008-9213-7>.
13. Lebel, J.; Mergler, D.; Branches, F.; Lucotte, M.; Amorim, M.; Larribe, F.; Dolbec, J. Neurotoxic Effects of Low-Level Methylmercury Contamination in the Amazonian Basin.

- Environ. Res.* **1998**, 79, 1, pp. 20–32. <https://doi.org/10.1006/enrs.1998.3846>.
14. Soria, M. L.; Sanz, P.; Martínez, D.; López-Artíguez, M.; Garrido, R.; Grilo, A.; Repetto, M. Total Mercury and Methylmercury in Hair, Maternal and Umbilical Blood, and Placenta from Women in the Seville Area. *Bull. Environ. Contam. Toxicol.* **1992**, 48, 4, pp. 494–501. <https://doi.org/10.1007/BF00199063>.
  15. Akagi, H.; Malm, O.; Kinjo, Y.; Harada, M.; Branches, F. J. P.; Pfeiffer, W. C.; Kato, H. Methylmercury Pollution in the Amazon, Brazil. *Sci. Total Environ.* **1995**, 175, 2, pp. 85–95. [https://doi.org/10.1016/0048-9697\(95\)04905-3](https://doi.org/10.1016/0048-9697(95)04905-3).
  16. Laffont, L.; Maurice, L.; Amouroux, D.; Navarro, P.; Monperrus, M.; Sonke, J. E.; Behra, P. Mercury Speciation Analysis in Human Hair by Species Specific Isotope Dilution Using GC-ICP-MS. *Anal. Bioanal. Chem.* **2013**, 405, pp. 3001–3010.
  17. White, G. H. Basics of Estimating Measurement Uncertainty. *Clin. Biochem. Rev.* **2008**, 29 Suppl 1, August, pp. S53-60.
  18. Scheme, A.; Laboratories, F. O. R. T e c h n i c a l G u i d e 2 A Guide on Measurement Uncertainty in Chemical & Microbiological Analysis. *Spring* **2008**, No. March.
  19. Eurachem/CITAC. *Quantifying Uncertainty in Analytical Measurements*; 2012. <https://doi.org/10.3329/jbas.v41i2.35494>.
  20. Allen, B. L.; Crawford, L. Guidance on Measurement Uncertainty for Medical Laboratories. **2014**, No. December, pp. 1–21.
  21. Šimundić, A. M. Bias in Research. *Biochem. Medica* **2013**, 23, 1, pp. 12–15. <https://doi.org/10.11613/BM.2013.003>.
  22. Weinhouse, C.; Gallis, J. A.; Ortiz, E.; Berky, A. J.; Morales, A. M.; Diringier, S. E.; Harrington, J.; Bullins, P.; Rogers, L.; Hare-, J.; Hsu-kim, H.; Pan, W. K.; Estudios, C. De. A Population-Based Mercury Exposure Assessment near an Artisanal and Small Scale Gold Mining Site in the Peruvian Amazon. *JESEE* **2019**, pp. 1–19.
